# Supplementary material for: Analyses of Fatty Acids, Proteins, Ascorbic Acid, Bioactive Phenolic Compounds and Antioxidant Activity of Canadian Barley Cultivars and Elite Germplasm
Source: MDPI journal article supplement (doi:10.3390/molecules27227852), 2022-11-14
Supplement: s1 [file s1]

Table S1: Fatty acid methyl ester (FAMES) percentage (%) in the ground meal of various clean barley cultivars analyzed by GCMS.

| FAME      | AC Metcalfe  | AAC Synergy  | AAC Goldman  | Lowe         | CDC Copeland | CDC Mindon   | CDC Bold     | Harrington    | CDC Bow      | Line 1       | Line 2        | Line 3        | Line 4       | Line 5       |
|-----------|--------------|--------------|--------------|--------------|--------------|--------------|--------------|---------------|--------------|--------------|---------------|---------------|--------------|--------------|
| C14:0     | 0.24±0.02e*  | 0.23±0.01e   | 0.24±0.0e    | 0.35±0.01d   | 0.23±0.0e    | 0.33±0.01d   | 0.36±0.06d   | 0.42±0.01bc   | 0.46±0.0ab   | 0.24±0.0e    | 0.48±0.01a    | 0.37±0.02cd   | 0.41±0.01bc  | 0.25±0.01e   |
| C15:0     | 0.04±0.0h    | 0.05±0.0gh   | 0.07±0.01e-g | 0.06±0.0f-h  | 0.06±0.01f-h | 0.06±0.0f-h  | 0.08±0.02c-e | 0.11±0.0a     | 0.10±0.0a-c  | 0.06±0.01gh  | 0.08±0.0d-f   | 0.09±0.01b-d  | 0.10±0.0a-c  | 0.04±0.0h    |
| C16:0     | 26.0±0.31c-e | 25.4±0.22d-g | 25.0±0.19g-i | 27.0±0.45ab  | 24.30±0.20j  | 26.9±0.27ab  | 26.0±0.47c-e | 25.2±0.13f-h  | 26.1±0.11cd  | 24.6±0.23h-j | 26.2±0.05bc   | 24.0±0.18j    | 25.9±0.27c-f | 27.1±0.09a   |
| C16:1     | 0.06±0.01f   | 0.07±0.01f   | 0.08±0.01f   | 0.09±0.01ef  | 0.07±0.0f    | 0.08±0.01ef  | 0.12±0.03b-d | 0.15±0.0a-c   | 0.12±0.0cd   | 0.08±0.0ef   | 0.11±0.0de    | 0.12±0.01b-d  | 0.15±0.01ab  | 0.07±0.01f   |
| C18:0     | 1.23±0.12gh  | 1.37±0.01d-g | 1.22±0.05gh  | 1.28±0.03f-h | 1.30±0.02f-h | 1.06±0.05h   | 1.31±0.11f-h | 1.58±0.02b-e  | 1.83±0.08ab  | 1.14±0.01gh  | 1.53±0.03c-f  | 1.88±0.09a    | 1.75±0.05a-c | 1.53±0.02c-f |
| C18:1 t   | 0.03±0.0b-d  | 0.03±0.01ab  | 0.04±0.01ab  | 0.04±0.01ab  | 0.02±0.0d    | 0.02±0.0d    | 0.02±0.0cd   | 0.04±0.0a     | 0.04±0.0ab   | 0.02±0.0d    | 0.04±0.0ab    | 0.03±0.0b-d   | 0.03±0.0bc   | 0.03±0.0b-d  |
| C18:1 c   | 10.9±0.22f   | 10.7±0.40f   | 11.6±0.13c-f | 10.6±1.98f   | 14.8±0.34a   | 11.3±0.22d-f | 11.8±0.11b-f | 13.2±0.18a-c  | 11.0±0.30f   | 11.7±0.13b-f | 13.4±0.24ab-e | 12.75±0.13b-d | 13.0±0.18b-d | 11.1±0.06ef  |
| C18:2     | 53.2±0.70ab  | 53.6±0.26ab  | 53.7±0.26a   | 54.3±0.47a   | 51.8±0.07bc  | 53.3±0.03ab  | 51.3±1.72c   | 48.1±0.27d    | 48.7±0.59d   | 53.4±0.23ab  | 47.8±0.32d    | 48.3±0.81d    | 47.0±0.08d   | 52.9±0.31a-c |
| C20:0     | 0.09±0.02f   | 0.10±0.01ef  | 0.11±0.01ef  | 0.16±0.03bc  | 0.11±0.01d-f | 0.10±0.01ef  | 0.15±0.02bc  | 0.22±0.01a    | 0.16±0.01bc  | 0.09±0.0f    | 0.13±0.0c-e   | 0.16±0.01bc   | 0.17±0.0b    | 0.11±0.01d-f |
| C20:1     | 0.40±0.03de  | 0.42±0.04de  | 0.43±0.02de  | 0.38±0.02e   | 0.44±0.02de  | 0.43±0.01de  | 0.53±0.07a-c | 0.56±0.02ab-c | 0.53±0.04a-d | 0.49±0.01b-d | 0.49±0.01b-d  | 0.60±0.03a    | 0.61±0.02a   | 0.42±0.02de  |
| C18:3 α   | 4.3±0.05fg   | 4.7±0.23d-f  | 5.0±0.0b-e   | 4.3±0.22f-h  | 4.3±0.13f-h  | 4.1±0.28gh   | 4.5±0.39e-g  | 4.7±0.09d-f   | 4.9±0.15c-e  | 5.6±0.08ab   | 3.7±0.06h     | 5.4±0.28a-c   | 5.3±0.38a-d  | 4.2±0.13f-h  |
| C20:2     | 0.03±0.01d   | 0.05±0.01d   | 0.04±0.0d    | 0.05±0.01d   | 0.04±0.0d    | 0.05±0.01cd  | 0.07±0.02bc  | 0.11±0.0a     | 0.11±0.01a   | 0.05±0.0d    | 0.09±0.0ab    | 0.11±0.01a    | 0.11±0.0a    | 0.05±0.01d   |
| C22:0     | 0.08±0.02h   | 0.11±0.01f-h | 0.11±0.0e-h  | 0.15±0.02cd  | 0.12±0.01d-g | 0.10±0.0f-h  | 0.19±0.03b   | 0.26±0.0a     | 0.20±0.0b    | 0.09±0.0gh   | 0.14±0.01de   | 0.20±0.02b    | 0.19±0.0b    | 0.11±0.01d-h |
| C22:1     | 0.03±0.01e   | 0.04±0.01e   | 0.04±0.0de   | 0.04±0.01de  | 0.03±0.01e   | 0.05±0.01c-e | 0.05±0.01c-e | 0.07±0.01a-c  | 0.08±0.01a   | 0.05±0.0c-e  | 0.06±0.0b-d   | 0.08±0.01ab   | 0.08±0.01a   | 0.03±0.01e   |
| C24:0     | 0.06±0.02fg  | 0.07±0.01e-g | 0.06±0.0g    | 0.09±0.01e-g | 0.08±0.01e-g | 0.09±0.01ef  | 0.10±0.02e   | 0.19±0.01a    | 0.18±0.0ab   | 0.07±0.0e-g  | 0.14±0.01cd   | 0.16±0.01a-c  | 0.15±0.0b-d  | 0.08±0.01e-g |
| CATME     | 0.04±0.0c    | 0.04±0.0c    | 0.04±0.0c    | 0.03±0.01c   | 0.03±0.0c    | 0.04±0.01c   | 0.05±0.02bc  | 0.07±0.01ab   | 0.08±0.0a    | 0.04±0.0c    | 0.07±0.01ab   | 0.09±0.02a    | 0.08±0.01a   | 0.04±0.0c    |
| CLnA      | 0.07±0.01e   | 0.08±0.0de   | 0.09±0.01de  | 0.08±0.01e   | 0.06±0.01e   | 0.07±0.01e   | 0.13±0.05bc  | 0.12±0.0b-d   | 0.16±0.0ab   | 0.09±0.01de  | 0.19±0.0a     | 0.15±0.01b    | 0.15±0.01b   | 0.09±0.0c-e  |
| SFA       | 27.74        | 27.33        | 26.81        | 29.09        | 26.2         | 28.64        | 28.19        | 27.98         | 29.03        | 26.29        | 28.7          | 26.86         | 28.67        | 29.22        |
| USFA      | 69.02        | 69.69        | 71.02        | 69.88        | 71.56        | 69.4         | 68.52        | 67.05         | 65.64        | 71.48        | 65.88         | 67.54         | 66.43        | 68.89        |
| Ratio U/S | 2.5          | 2.5          | 2.6          | 2.4          | 2.7          | 2.4          | 2.4          | 2.4           | 2.3          | 2.7          | 2.3           | 2.5           | 2.3          | 2.4          |
| Other     | 0.04         | 0.04         | 0.04         | 0.03         | 0.03         | 0.04         | 0.05         | 0.07          | 0.08         | 0.04         | 0.07          | 0.09          | 0.08         | 0.04         |

\*Results are the mean of three measurements ± SD. Mean values that do not share a letter in each row are significantly different at the 0.05 level using Tukey test. Statistical analysis was done using JMP 16 (SAS, NC, USA).

Methyl myristate (C14:0); Methyl pentadecanoate (C15:0); Methyl palmitate (C16:0); Methyl palmitoleate (C16:1); Methyl stearate (C18:0); trans-9-Elaidic acid methyl ester (C18:1t); cis-9-Oleic acid methyl ester (C18:1c); Methyl linoleate (C18:2); Methyl arachidate (C20:0); Methyl cis-11-eicosenoate (C20:1); Methyl linolenate (C18:3α); cis-11,14-Eicosadienoic acid methyl ester (C20:2); Methyl behenate (C22:0); Methyl erucate (C22:1); Methyl lignocerate (C24:0); Conjugated alpha linolenic acid (CLnA); saturated fatty acids (SFA); Unsaturated fatty acids (USFA); Ratio unsaturated fatty acids/saturated fatty acids (ratio U/S); Citric acid trimethyl ester (CATME)

A.

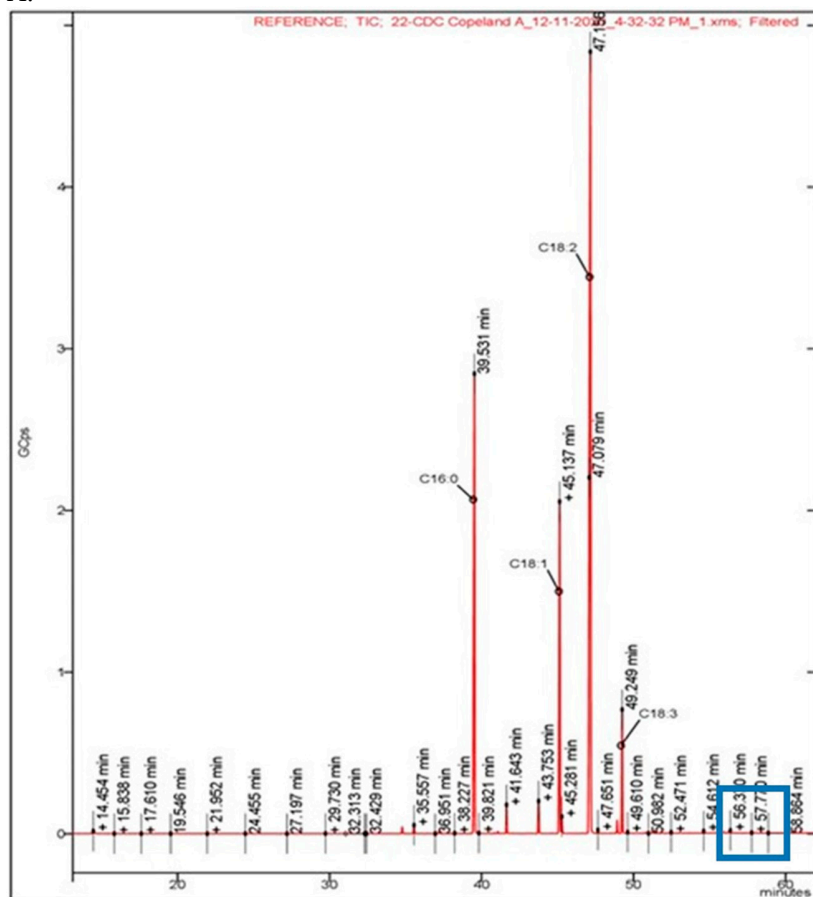

B.

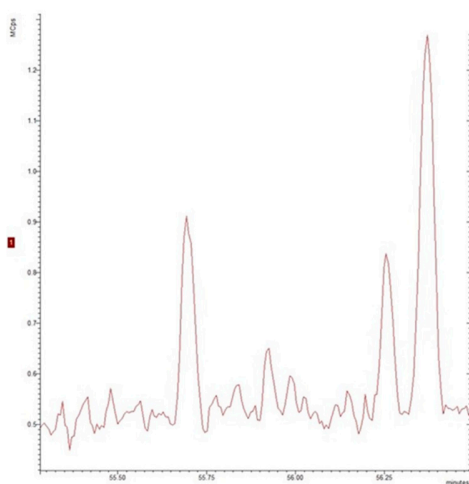

Supplementary Figure S1. GC/MS chromatogram of CDC Copeland grain sample showing the major peaks. C. Enlarged insert (blue square in A) of the chromatogram, Rt 55.69 is Citric acid trimethyl ester; Rt 56.261 is Methyl 9 cis, 11 trans, 13 trans-Octadecatrienoate.
